# Supplementary material for: Predicting further suicidal behaviour in attempted suicide patients : a thesis presented in partial fulfilment of the requirements for the degree Doctor of Philosophy in Psychology at Massey University
Source: Royal Society of Chemistry journal article supplement (doi:10.1039/d4sc01767f), 1983-01-01

## Supporting Information

# PuCl<sub>3</sub>{CoCp[OP(OEt)<sub>2</sub>]<sub>3</sub>}: Transuranic Elements Entering the Field of Heterometallic Molecular Chemistry.

Thomas E. Shaw,<sup>1,†</sup> Zachary R. Jones,<sup>1,†</sup> Sara L. Adelman,<sup>1,\*</sup> Nickolas H. Anderson,<sup>1</sup> Eric G. Bowes,<sup>1</sup> Eric D. Bauer,<sup>1,\*</sup> David Dan,<sup>1</sup> Jan Klouda,<sup>1</sup> Karah E. Knope,<sup>2,\*</sup> Stosh A. Kozimor,<sup>1,\*</sup> Molly M. MacInnes,<sup>1</sup> Veronika Mocko,<sup>1</sup> Francisca R. Rocha,<sup>1</sup> Harrison D. Root,<sup>1</sup> Benjamin W. Stein,<sup>1</sup> Joe D. Thompson,<sup>1</sup> Jennifer N. Wacker.<sup>1,2</sup>

<sup>1</sup> Los Alamos National Laboratory (LANL), P.O. Box 1663, Los Alamos, New Mexico, 87545, USA

<sup>2</sup> Department of Chemistry, Georgetown University, 37th and O Streets NW, Washington, D.C. 20057, USA

\* To whom correspondence should be directed, *e-mail*; [sadelman@lanl.gov](mailto:sadelman@lanl.gov), [stosh@lanl.gov](mailto:stosh@lanl.gov), [karah.knope@georgetown.edu](mailto:karah.knope@georgetown.edu)

† Contributed equally and are joint first authors.

LA-UR-23-33472

---

## Table of Contents

**Table S1 (p 2).** Crystallographic parameters for PuCl<sub>3</sub>{CoCp[OP(OEt)<sub>2</sub>]<sub>3</sub>}.

**Table S2 (p 3).** Fractional Atomic Coordinates ( $\times 10^4$ ) and Equivalent Isotropic Displacement Parameters ( $\text{\AA}^2 \times 10^3$ ) for PuCl<sub>3</sub>{CoCp[OP(OEt)<sub>2</sub>]<sub>3</sub>}.

**Table S3 (p 5).** Bond lengths ( $\text{\AA}$ ) and angles ( $^\circ$ ) for PuCl<sub>3</sub>{CoCp[OP(OEt)<sub>2</sub>]<sub>3</sub>}.

**Table S4 (p 7).** Anisotropic Displacement Parameters ( $\text{\AA}^2 \times 10^3$ ) for PuCl<sub>3</sub>{CoCp[OP(OEt)<sub>2</sub>]<sub>3</sub>}.

**Table S5 (p 9).** Hydrogen Atom Coordinates ( $\text{\AA} \times 10^4$ ) and Isotropic Displacement Parameters ( $\text{\AA}^2 \times 10^3$ ) for PuCl<sub>3</sub>{CoCp[OP(OEt)<sub>2</sub>]<sub>3</sub>}.

**Figure S1 (p 11).** The solution-state UV-Vis spectra of Na{CoCp[OP(OEt)<sub>2</sub>]<sub>3</sub>}.

**Figure S2 (p 12).** The solution-state <sup>1</sup>H NMR spectrum of Na{CoCp[OP(OEt)<sub>2</sub>]<sub>3</sub>} in CDCl<sub>3</sub>.

**Figure S3 (p 13).** The solution-state  $^1\text{H}$  NMR spectrum of  $\text{PuCl}_3\{\text{CoCp}[\text{OP}(\text{OEt})_2]_3\}$  in  $\text{CDCl}_3$ . The inset is a zoomed in view of the doublet of quintets at 3.03 ppm that correspond to the methylene protons of the  $\text{CoCp}[\text{OP}(\text{OEt})_2]_3^-$  ligand.

**Table S1.** Crystallographic parameters for PuCl<sub>3</sub>{CoCp[OP(OEt)<sub>2</sub>]<sub>3</sub>}.

|                                             |                                                               |
|---------------------------------------------|---------------------------------------------------------------|
| Formula weight                              | 883.64                                                        |
| Temperature/K                               | 288(2)                                                        |
| Crystal system                              | monoclinic                                                    |
| Space group                                 | P2 <sub>1</sub> /n                                            |
| a, b, c                                     | 10.7630(16), 15.914(2), 18.230(3)                             |
| $\alpha, \beta, \gamma$                     | 90, 95.148(5), 90                                             |
| Volume/Å <sup>3</sup>                       | 3109.8(8)                                                     |
| Z                                           | 4                                                             |
| $\rho_{\text{calc}}/\text{cm}^3$            | 1.887                                                         |
| $\mu/\text{mm}^{-1}$                        | 3.085                                                         |
| F(000)                                      | 1704.0                                                        |
| Crystal size/mm <sup>3</sup>                | 0.116 × 0.066 × 0.036                                         |
| Radiation                                   | MoK $\alpha$ ( $\lambda = 0.71073$ )                          |
| 2 $\Theta$ range for data collection/°      | 4.236 to 50.78                                                |
| Index ranges                                | -12 ≤ h ≤ 12, -19 ≤ k ≤ 19, -21 ≤ l ≤ 21                      |
| Reflections collected                       | 93339                                                         |
| Independent reflections                     | 5704 [R <sub>int</sub> = 0.0643, R <sub>sigma</sub> = 0.0241] |
| Data/restraints/parameters                  | 5704/1376/534                                                 |
| Goodness-of-fit on F <sup>2</sup>           | 1.084                                                         |
| Final R indexes [I ≥ 2 $\sigma$ (I)]        | R <sub>1</sub> = 0.0385, wR <sub>2</sub> = 0.0792             |
| Final R indexes [all data]                  | R <sub>1</sub> = 0.0503, wR <sub>2</sub> = 0.0837             |
| Largest diff. peak/hole / e Å <sup>-3</sup> | 1.01/-1.36                                                    |

**Table S2:** Fractional Atomic Coordinates ( $\times 10^4$ ) and Equivalent Isotropic Displacement Parameters ( $\text{\AA}^2 \times 10^3$ ) for  $\text{PuCl}_3\{\text{CoCp}[\text{OP}(\text{OEt})_2]_3\}$ .  $U_{\text{eq}}$  is defined as 1/3 of the trace of the orthogonalised  $U_{\text{IJ}}$  tensor.

| Atom | <i>x</i>   | <i>y</i>   | <i>z</i>   | <i>U</i> (eq) |
|------|------------|------------|------------|---------------|
| Pu1  | 4826.6(2)  | 7218.7(2)  | 8029.1(2)  | 45.93(9)      |
| Co1  | 5842.0(8)  | 5051.9(5)  | 6915.4(5)  | 49.5(2)       |
| C11  | 2740(20)   | 7320(30)   | 8600(20)   | 89(5)         |
| C11B | 2654(8)    | 7534(16)   | 8440(13)   | 83(3)         |
| C12  | 4900(30)   | 8599(16)   | 7300(20)   | 82(4)         |
| C12B | 4840(40)   | 8696(16)   | 7460(30)   | 78(5)         |
| C13  | 6150(20)   | 7550(30)   | 9239(9)    | 84(5)         |
| C13B | 6050(20)   | 7760(20)   | 9209(6)    | 70(4)         |
| P1   | 4350.4(16) | 5890.2(11) | 6509.5(10) | 52.7(4)       |
| P2   | 7098.6(16) | 6088.6(11) | 7180.3(10) | 54.1(4)       |
| P3   | 5265.0(19) | 5043.9(11) | 8019.9(10) | 57.6(4)       |
| O1   | 3957(4)    | 6571(3)    | 7035(2)    | 56.8(11)      |
| O2   | 4977(4)    | 5885(3)    | 8375(3)    | 59.1(11)      |
| O3   | 6551(4)    | 6875(3)    | 7504(3)    | 52.5(11)      |
| O4   | 3166(7)    | 5454(6)    | 6121(6)    | 63(3)         |
| C1   | 2117(16)   | 5212(13)   | 6555(8)    | 100(5)        |
| C2   | 975(16)    | 5167(19)   | 6009(17)   | 152(10)       |
| O4B  | 3132(19)   | 5301(16)   | 6480(20)   | 74(6)         |
| C1B  | 1820(20)   | 5590(20)   | 6350(20)   | 76(8)         |
| C2B  | 1170(30)   | 4900(30)   | 5880(30)   | 96(12)        |
| O5   | 4744(5)    | 6355(3)    | 5792(3)    | 76.2(14)      |
| C3   | 3934(9)    | 6999(6)    | 5447(5)    | 87(2)         |
| C4   | 4679(13)   | 7662(8)    | 5176(8)    | 135(4)        |
| O6   | 7480(20)   | 6369(13)   | 6394(7)    | 84(3)         |
| C5   | 7640(30)   | 7050(13)   | 6020(13)   | 89(3)         |
| C6   | 8130(30)   | 6950(20)   | 5345(13)   | 108(5)        |
| O6B  | 7996(12)   | 6344(8)    | 6575(7)    | 75(2)         |
| C5B  | 8102(19)   | 7082(10)   | 6260(10)   | 93(3)         |
| C6B  | 8820(20)   | 7138(13)   | 5662(12)   | 118(5)        |
| O7   | 8506(14)   | 5920(20)   | 7450(20)   | 74(3)         |
| C7   | 9410(30)   | 6390(20)   | 7860(30)   | 81(4)         |
| C8   | 10430(30)  | 5930(30)   | 8190(30)   | 91(6)         |
| O7B  | 8152(8)    | 5759(5)    | 7788(5)    | 72(2)         |
| C7B  | 9059(11)   | 6270(7)    | 8158(7)    | 84(3)         |

| <b>Atom</b> | <b>x</b>  | <b>y</b> | <b>z</b> | <b>U(eq)</b> |
|-------------|-----------|----------|----------|--------------|
| C8B         | 10019(12) | 5826(9)  | 8573(9)  | 101(4)       |
| O8          | 6038(12)  | 4480(7)  | 8608(5)  | 72(2)        |
| C9          | 6585(19)  | 4808(11) | 9283(8)  | 97(3)        |
| C10         | 7350(20)  | 4343(14) | 9711(11) | 127(6)       |
| O8B         | 6486(16)  | 4736(14) | 8514(9)  | 86(3)        |
| C9B         | 7050(20)  | 4973(16) | 9208(11) | 94(3)        |
| C10B        | 8040(30)  | 4570(20) | 9495(15) | 110(6)       |
| O9          | 3979(6)   | 4522(4)  | 7959(4)  | 74(2)        |
| C11         | 3236(12)  | 4412(8)  | 8577(8)  | 94(3)        |
| C12         | 3377(17)  | 3438(10) | 8739(10) | 132(5)       |
| O9B         | 4650(20)  | 4260(11) | 8385(13) | 82(3)        |
| C11B        | 3320(30)  | 4220(30) | 8220(18) | 89(3)        |
| C12B        | 2870(30)  | 3860(30) | 8960(20) | 99(6)        |
| C13         | 5390(14)  | 4302(10) | 5989(8)  | 62(2)        |
| C14         | 5357(13)  | 3830(8)  | 6638(10) | 63(2)        |
| C15         | 6575(15)  | 3852(9)  | 7018(7)  | 63(2)        |
| C16         | 7330(10)  | 4336(9)  | 6603(9)  | 63(2)        |
| C17         | 6606(17)  | 4632(8)  | 5965(7)  | 64(2)        |
| C13B        | 5129(16)  | 4040(13) | 6282(16) | 62(2)        |
| C14B        | 5720(20)  | 3743(12) | 6951(14) | 62(2)        |
| C15B        | 7000(20)  | 3987(17) | 6985(11) | 63(3)        |
| C16B        | 7173(18)  | 4446(16) | 6354(15) | 63(2)        |
| C17B        | 6020(30)  | 4491(15) | 5913(10) | 63(2)        |

**Table S3:** Bond lengths (Å) and angles (°) for PuCl<sub>3</sub>{CoCp[OP(OEt)<sub>2</sub>]<sub>3</sub>}.

| Bond Lengths (Å) |           | Bond Angles (°) |           |             |            |
|------------------|-----------|-----------------|-----------|-------------|------------|
| Pu1-Cl1          | 2.567(7)  | Cl1-Pu1-Cl2     | 103.2(16) | O3-P2-Co1   | 117.23(18) |
| Pu1-Cl1B         | 2.569(4)  | Cl1-Pu1-Cl3     | 94.2(11)  | O3-P2-O6    | 104.9(8)   |
| Pu1-Cl2          | 2.576(5)  | Cl1B-Pu1-Cl2B   | 88.7(13)  | O3-P2-O6B   | 109.9(5)   |
| Pu1-Cl2B         | 2.573(7)  | Cl3-Pu1-Cl2     | 103.3(14) | O3-P2-O7    | 114.5(11)  |
| Pu1-Cl3          | 2.569(6)  | Cl3B-Pu1-Cl1B   | 95.7(7)   | O3-P2-O7B   | 106.0(4)   |
| Pu1-Cl3B         | 2.569(5)  | Cl3B-Pu1-Cl2B   | 90.6(15)  | O6-P2-Co1   | 102.7(8)   |
| Pu1-O1           | 2.218(4)  | O1-Pu1-Cl1      | 92.4(8)   | O6B-P2-Co1  | 116.7(5)   |
| Pu1-O2           | 2.216(5)  | O1-Pu1-Cl1B     | 90.0(4)   | O6B-P2-O7B  | 97.4(7)    |
| Pu1-O3           | 2.231(4)  | O1-Pu1-Cl2      | 90.2(9)   | O7-P2-Co1   | 120.2(12)  |
| Co1-P1           | 2.166(2)  | O1-Pu1-Cl2B     | 96.3(13)  | O7-P2-O6    | 90.9(18)   |
| Co1-P2           | 2.160(2)  | O1-Pu1-Cl3      | 163.2(11) | O7B-P2-Co1  | 107.1(3)   |
| Co1-P3           | 2.160(2)  | O1-Pu1-Cl3B     | 171.1(9)  | O2-P3-Co1   | 118.4(2)   |
| Co1-C13          | 2.089(10) | O1-Pu1-O3       | 80.92(16) | O2-P3-O8    | 108.9(5)   |
| Co1-C14          | 2.064(12) | O2-Pu1-Cl1      | 89.1(12)  | O2-P3-O8B   | 102.5(8)   |
| Co1-C15          | 2.069(13) | O2-Pu1-Cl1B     | 98.6(7)   | O2-P3-O9    | 106.0(3)   |
| Co1-C16          | 2.086(13) | O2-Pu1-Cl2      | 163.7(11) | O2-P3-O9B   | 113.8(9)   |
| Co1-C17          | 2.093(12) | O2-Pu1-Cl2B     | 171.0(14) | O8-P3-Co1   | 117.3(5)   |
| Co1-C13B         | 2.086(11) | O2-Pu1-Cl3      | 86.1(11)  | O8-P3-O9    | 98.7(6)    |
| Co1-C14B         | 2.088(19) | O2-Pu1-Cl3B     | 93.8(9)   | O8B-P3-Co1  | 103.7(8)   |
| Co1-C15B         | 2.10(2)   | O2-Pu1-O1       | 78.59(17) | O9-P3-Co1   | 104.8(3)   |
| Co1-C16B         | 2.07(2)   | O2-Pu1-O3       | 81.10(16) | O9B-P3-Co1  | 124.1(10)  |
| Co1-C17B         | 2.06(2)   | O3-Pu1-Cl1      | 169.1(9)  | O9B-P3-O8B  | 82.7(13)   |
| P1-O1            | 1.531(5)  | O3-Pu1-Cl1B     | 170.9(4)  | P1-O1-Pu1   | 136.1(3)   |
| P1-O4            | 1.564(8)  | O3-Pu1-Cl2      | 85.5(10)  | P3-O2-Pu1   | 136.8(3)   |
| P1-O4B           | 1.61(2)   | O3-Pu1-Cl2B     | 90.9(12)  | P2-O3-Pu1   | 137.1(3)   |
| P1-O5            | 1.593(6)  | O3-Pu1-Cl3      | 90.0(7)   | C1-O4-P1    | 120.1(9)   |
| P2-O3            | 1.525(5)  | O3-Pu1-Cl3B     | 93.4(6)   | O4-C1-C2    | 105.9(14)  |
| P2-O6            | 1.588(8)  | P3-Co1-P2       | 91.30(8)  | C1B-O4B-P1  | 126(2)     |
| P2-O6B           | 1.584(7)  | C13-Co1-P2      | 135.5(6)  | O4B-C1B-C2B | 104.2(16)  |
| P2-O7            | 1.575(9)  | C13-Co1-P3      | 133.2(6)  | C3-O5-P1    | 119.3(5)   |
| P2-O7B           | 1.601(6)  | C13-Co1-C17     | 39.6(4)   | C4-C3-O5    | 109.6(9)   |
| P3-O2            | 1.531(5)  | C14-Co1-P2      | 156.0(4)  | C5-O6-P2    | 139.9(16)  |
| P3-O8            | 1.577(7)  | C14-Co1-P3      | 97.8(4)   | O6-C5-C6    | 116.3(15)  |
| P3-O8B           | 1.602(8)  | C14-Co1-C13     | 39.5(5)   | C5B-O6B-P2  | 128.0(10)  |
| P3-O9            | 1.609(6)  | C14-Co1-C15     | 40.4(4)   | O6B-C5B-C6B | 118.3(13)  |
| P3-O9B           | 1.584(9)  | C14-Co1-C16     | 66.5(5)   | C7-O7-P2    | 133(2)     |
| O4-C1            | 1.486(13) | C14-Co1-C17     | 66.8(5)   | O7-C7-C8    | 115.1(18)  |
| C1-C2            | 1.51(2)   | C15-Co1-P2      | 117.3(5)  | C7B-O7B-P2  | 124.3(7)   |
| O4B-C1B          | 1.487(15) | C15-Co1-P3      | 92.8(4)   | O7B-C7B-C8B | 114.4(9)   |

|           |           |               |            |                |           |
|-----------|-----------|---------------|------------|----------------|-----------|
| C1B-C2B   | 1.52(2)   | C15-Co1-C13   | 66.7(5)    | C9-O8-P3       | 122.3(10) |
| O5-C3     | 1.452(9)  | C15-Co1-C16   | 39.1(4)    | C10-C9-O8      | 120.0(14) |
| C3-C4     | 1.439(14) | C15-Co1-C17   | 66.7(5)    | C9B-O8B-P3     | 133.7(15) |
| O6-C5     | 1.300(13) | C16-Co1-P2    | 89.9(3)    | C10B-C9B-O8B   | 120.0(16) |
| C5-C6     | 1.392(16) | C16-Co1-P3    | 122.9(4)   | C11-O9-P3      | 122.7(7)  |
| O6B-C5B   | 1.316(12) | C16-Co1-C13   | 66.2(4)    | O9-C11-C12     | 102.3(11) |
| C5B-C6B   | 1.392(15) | C16-Co1-C17   | 39.7(4)    | C11B-O9B-P3    | 113(2)    |
| O7-C7     | 1.392(14) | C17-Co1-P2    | 98.3(5)    | O9B-C11B-C12B  | 102.2(16) |
| C7-C8     | 1.407(16) | C17-Co1-P3    | 159.5(3)   | C14-C13-Co1    | 69.3(7)   |
| O7B-C7B   | 1.397(11) | C13B-Co1-P2   | 154.8(9)   | C14-C13-C17    | 108.5(10) |
| C7B-C8B   | 1.415(13) | C13B-Co1-P3   | 112.9(10)  | C17-C13-Co1    | 70.4(6)   |
| O8-C9     | 1.414(13) | C13B-Co1-C15B | 39.4(5)    | C13-C14-Co1    | 71.2(7)   |
| C9-C10    | 1.308(15) | C14B-Co1-P2   | 66.3(6)    | C13-C14-C15    | 107.8(11) |
| O8B-C9B   | 1.403(13) | C14B-Co1-P3   | 142.6(8)   | C15-C14-Co1    | 70.0(7)   |
| C9B-C10B  | 1.312(16) | C14B-Co1-C13B | 86.6(6)    | C14-C15-Co1    | 69.6(7)   |
| O9-C11    | 1.450(13) | C14B-Co1-C15B | 39.8(5)    | C16-C15-Co1    | 71.1(7)   |
| C11-C12   | 1.582(17) | C15B-Co1-P2   | 104.2(7)   | C16-C15-C14    | 107.8(10) |
| O9B-C11B  | 1.446(16) | C15B-Co1-P3   | 99.1(6)    | C15-C16-Co1    | 69.7(7)   |
| C11B-C12B | 1.584(19) | C16B-Co1-P2   | 91.1(6)    | C15-C16-C17    | 108.9(10) |
| C13-C14   | 1.404(16) | C16B-Co1-P3   | 136.7(8)   | C17-C16-Co1    | 70.4(7)   |
| C13-C17   | 1.415(16) | C16B-Co1-C13B | 66.7(6)    | C13-C17-Co1    | 70.1(6)   |
| C14-C15   | 1.426(15) | C16B-Co1-C14B | 66.4(7)    | C13-C17-C16    | 107.0(10) |
| C15-C16   | 1.392(14) | C16B-Co1-C15B | 38.9(5)    | C16-C17-Co1    | 69.9(7)   |
| C16-C17   | 1.420(14) | C17B-Co1-P2   | 115.1(9)   | C14B-C13B-Co1  | 70.4(9)   |
| C13B-C14B | 1.406(17) | C17B-Co1-P3   | 151.9(8)   | C14B-C13B-C17B | 108.0(12) |
| C13B-C17B | 1.414(17) | C17B-Co1-C13B | 39.9(5)    | C17B-C13B-Co1  | 68.9(11)  |
| C14B-C15B | 1.427(16) | C17B-Co1-C14B | 66.8(7)    | C13B-C14B-Co1  | 70.2(9)   |
| C15B-C16B | 1.389(15) | C17B-Co1-C15B | 66.5(7)    | C13B-C14B-C15B | 107.8(12) |
| C16B-C17B | 1.419(16) | C17B-Co1-C16B | 40.2(5)    | C15B-C14B-Co1  | 70.6(11)  |
|           |           | O1-P1-Co1     | 117.40(19) | C14B-C15B-Co1  | 69.6(11)  |
|           |           | O1-P1-04      | 109.7(4)   | C16B-C15B-Co1  | 69.4(12)  |
|           |           | O1-P1-O4B     | 99.4(11)   | C16B-C15B-C14B | 107.9(12) |
|           |           | O1-P1-O5      | 107.2(3)   | C15B-C16B-Co1  | 71.7(13)  |
|           |           | O4-P1-Co1     | 115.5(4)   | C15B-C16B-C17B | 108.7(12) |
|           |           | O4-P1-O5      | 95.7(5)    | C17B-C16B-Co1  | 69.3(12)  |
|           |           | O4B-P1-Co1    | 103.3(8)   | C13B-C17B-Co1  | 71.2(10)  |
|           |           | O5-P1-Co1     | 108.8(2)   | C13B-C17B-C16B | 107.5(12) |
|           |           | O5-P1-O4B     | 121.2(13)  | C16B-C17B-Co1  | 70.5(12)  |

---

**Table S4:** Anisotropic Displacement Parameters ( $\text{\AA}^2 \times 10^3$ ) for  $\text{PuCl}_3\{\text{CoCp}[\text{OP}(\text{OEt})_2]_3\}$ . TheAnisotropic displacement factor exponent takes the form:  $-2\pi^2[h^2a^{*2}U_{11}+2hka^*b^*U_{12}+\dots]$ .

| Atom | $U_{11}$  | $U_{22}$  | $U_{33}$  | $U_{23}$  | $U_{13}$ | $U_{12}$  |
|------|-----------|-----------|-----------|-----------|----------|-----------|
| Pu1  | 44.75(14) | 43.44(13) | 49.19(14) | -9.68(11) | 1.96(9)  | -1.41(11) |
| Co1  | 53.0(5)   | 43.3(5)   | 50.6(5)   | -7.2(4)   | -4.6(4)  | 8.6(4)    |
| Cl1  | 71(6)     | 92(11)    | 107(10)   | -4(8)     | 32(6)    | -7(5)     |
| Cl1B | 61(3)     | 86(7)     | 104(6)    | -11(4)    | 23(3)    | 10(3)     |
| Cl2  | 101(5)    | 53(4)     | 90(8)     | 8(5)      | -3(5)    | 3(4)      |
| Cl2B | 86(6)     | 44(4)     | 100(11)   | -1(6)     | -7(8)    | 8(4)      |
| Cl3  | 101(6)    | 75(10)    | 72(5)     | -19(4)    | -24(4)   | -7(6)     |
| Cl3B | 80(5)     | 69(8)     | 60(3)     | -9(3)     | -6(3)    | -19(4)    |
| P1   | 52.6(10)  | 51.1(9)   | 51.5(10)  | -11.6(8)  | -11.1(8) | 9.2(8)    |
| P2   | 46.8(9)   | 53.5(10)  | 62.4(11)  | -4.6(8)   | 7.5(8)   | 1.9(8)    |
| P3   | 70.2(12)  | 45.8(9)   | 56.6(11)  | 3.9(8)    | 4.1(9)   | -1.9(8)   |
| O1   | 58(3)     | 59(3)     | 52(3)     | -13(2)    | -7(2)    | 9(2)      |
| O2   | 74(3)     | 52(2)     | 53(3)     | -4(2)     | 10(2)    | -5(2)     |
| O3   | 43(2)     | 43(2)     | 73(3)     | -6(2)     | 13(2)    | -2.8(18)  |
| O4   | 59(4)     | 72(5)     | 53(5)     | -13(4)    | -14(3)   | 4(3)      |
| C1   | 90(7)     | 110(9)    | 100(8)    | 18(7)     | -3(5)    | -22(7)    |
| C2   | 80(9)     | 190(20)   | 182(17)   | 15(15)    | -30(10)  | -30(12)   |
| O4B  | 58(7)     | 73(8)     | 87(11)    | -14(8)    | -10(7)   | -1(6)     |
| C1B  | 62(8)     | 79(11)    | 84(12)    | -5(9)     | -7(8)    | 1(7)      |
| C2B  | 71(16)    | 105(18)   | 105(19)   | -11(14)   | -24(14)  | -16(13)   |
| O5   | 89(3)     | 78(3)     | 62(3)     | 3(2)      | 7(2)     | 28(2)     |
| C3   | 94(4)     | 86(4)     | 80(4)     | 6(3)      | 1(3)     | 25(3)     |
| C4   | 144(8)    | 111(7)    | 148(8)    | 24(6)     | 6(7)     | 4(6)      |
| O6   | 83(6)     | 88(5)     | 84(5)     | 0(4)      | 25(5)    | -15(5)    |
| C5   | 85(6)     | 98(5)     | 86(5)     | 14(5)     | 16(5)    | -3(5)     |
| C6   | 111(11)   | 126(10)   | 88(8)     | 12(8)     | 22(8)    | 0(9)      |
| O6B  | 62(5)     | 83(4)     | 84(4)     | 0(4)      | 20(4)    | -4(4)     |
| C5B  | 93(6)     | 99(5)     | 88(5)     | 13(4)     | 18(5)    | -5(5)     |
| C6B  | 123(10)   | 132(9)    | 105(9)    | 24(8)     | 35(7)    | -8(8)     |
| O7   | 59(4)     | 78(5)     | 86(5)     | -7(5)     | 4(4)     | 1(4)      |
| C7   | 70(5)     | 82(6)     | 90(6)     | -4(5)     | -3(5)    | -4(5)     |
| C8   | 77(9)     | 93(10)    | 99(11)    | -6(10)    | -7(9)    | -2(9)     |
| O7B  | 55(3)     | 71(4)     | 87(4)     | -7(3)     | -13(3)   | 2(3)      |
| C7B  | 74(4)     | 85(5)     | 91(5)     | -4(4)     | -8(4)    | -7(4)     |
| C8B  | 80(7)     | 103(7)    | 115(8)    | -17(7)    | -22(6)   | -1(6)     |
| O8   | 79(4)     | 73(4)     | 65(4)     | 19(3)     | 4(4)     | -6(4)     |
| C9   | 95(6)     | 104(6)    | 88(5)     | 11(4)     | -13(5)   | -2(5)     |



| <b>Atom</b> | <b>U<sub>11</sub></b> | <b>U<sub>22</sub></b> | <b>U<sub>33</sub></b> | <b>U<sub>23</sub></b> | <b>U<sub>13</sub></b> | <b>U<sub>12</sub></b> |
|-------------|-----------------------|-----------------------|-----------------------|-----------------------|-----------------------|-----------------------|
| C10         | 132(10)               | 128(10)               | 113(9)                | 17(8)                 | -32(8)                | 8(8)                  |
| O8B         | 96(5)                 | 91(6)                 | 71(5)                 | 15(5)                 | -2(5)                 | 11(5)                 |
| C9B         | 93(6)                 | 98(6)                 | 87(5)                 | 15(5)                 | -9(5)                 | -9(5)                 |
| C10B        | 104(9)                | 116(10)               | 105(10)               | 22(9)                 | -11(8)                | 2(8)                  |
| O9          | 81(4)                 | 67(4)                 | 76(4)                 | 2(3)                  | 9(3)                  | -25(3)                |
| C11         | 93(5)                 | 100(5)                | 91(5)                 | 0(4)                  | 14(4)                 | -24(4)                |
| C12         | 134(9)                | 129(7)                | 135(9)                | 37(7)                 | 13(8)                 | -30(7)                |
| O9B         | 88(5)                 | 76(5)                 | 82(5)                 | 7(5)                  | 10(4)                 | -15(4)                |
| C11B        | 91(5)                 | 87(6)                 | 89(6)                 | 0(5)                  | 10(5)                 | -18(5)                |
| C12B        | 102(10)               | 95(11)                | 102(10)               | 5(9)                  | 21(9)                 | -18(10)               |
| C13         | 71(4)                 | 55(4)                 | 61(4)                 | -16(3)                | 2(4)                  | 7(3)                  |
| C14         | 72(4)                 | 50(3)                 | 66(4)                 | -13(3)                | -1(4)                 | 5(3)                  |
| C15         | 69(4)                 | 50(4)                 | 70(4)                 | -8(3)                 | -1(4)                 | 11(4)                 |
| C16         | 70(4)                 | 55(4)                 | 65(4)                 | -10(4)                | 4(3)                  | 15(3)                 |
| C17         | 71(4)                 | 58(4)                 | 62(4)                 | -12(3)                | 4(4)                  | 9(4)                  |
| C13B        | 69(4)                 | 52(4)                 | 64(4)                 | -13(4)                | 0(4)                  | 5(4)                  |
| C14B        | 69(5)                 | 51(4)                 | 66(4)                 | -9(4)                 | 2(4)                  | 8(4)                  |
| C15B        | 67(4)                 | 53(4)                 | 69(4)                 | -8(4)                 | 3(4)                  | 12(4)                 |
| C16B        | 68(4)                 | 57(4)                 | 65(4)                 | -10(4)                | 4(4)                  | 11(4)                 |
| C17B        | 69(4)                 | 56(4)                 | 62(4)                 | -13(4)                | 3(4)                  | 7(4)                  |

**Table S5:** Hydrogen Atom Coordinates ( $\text{\AA}\times 10^4$ ) and Isotropic Displacement Parameters ( $\text{\AA}^2\times 10^3$ ) for  $\text{PuCl}_3\{\text{CoCp}[\text{OP}(\text{OEt})_2]_3\}$ .

| Atom | <i>x</i> | <i>y</i> | <i>z</i> | U(eq) |
|------|----------|----------|----------|-------|
| H1A  | 2001.93  | 5627.52  | 6931.86  | 120   |
| H1B  | 2277.09  | 4671.03  | 6789.63  | 120   |
| H2A  | 811.86   | 4592.32  | 5873.12  | 229   |
| H2B  | 1118.89  | 5486.72  | 5577.42  | 229   |
| H2C  | 270.5    | 5394.85  | 6228.32  | 229   |
| H1BA | 1772.5   | 6122.95  | 6082     | 91    |
| H1BB | 1443.89  | 5661.95  | 6806.76  | 91    |
| H2BA | 1784.83  | 4560.74  | 5671.24  | 143   |
| H2BB | 620.29   | 5142.87  | 5498.41  | 143   |
| H2BC | 699.59   | 4553.59  | 6190.16  | 143   |
| H3A  | 3404.55  | 6757.03  | 5042.54  | 105   |
| H3B  | 3403.4   | 7223.81  | 5802.24  | 105   |
| H4A  | 5275.45  | 7851.47  | 5563.86  | 202   |
| H4B  | 4148.07  | 8122.08  | 5009.93  | 202   |
| H4C  | 5109     | 7456.52  | 4773.33  | 202   |
| H5A  | 8183.98  | 7421.39  | 6321.13  | 107   |
| H5B  | 6835.48  | 7330.77  | 5933.14  | 107   |
| H6A  | 8942.57  | 6700.18  | 5422.85  | 162   |
| H6B  | 8183.57  | 7482.03  | 5109.72  | 162   |
| H6C  | 7592.32  | 6582.25  | 5037.46  | 162   |
| H5B1 | 8448.79  | 7469.96  | 6634.06  | 111   |
| H5B2 | 7268.48  | 7277.85  | 6099.33  | 111   |
| H6B1 | 9668.82  | 7253.71  | 5835.3   | 178   |
| H6B2 | 8502.25  | 7583.2   | 5341.95  | 178   |
| H6B3 | 8774     | 6616.35  | 5396.62  | 178   |
| H7A  | 9009.35  | 6677.42  | 8250.47  | 98    |
| H7B  | 9714.11  | 6817.83  | 7546.31  | 98    |
| H8A  | 10707.51 | 6175.61  | 8655.53  | 136   |
| H8B  | 11094.88 | 5946.36  | 7871.33  | 136   |
| H8C  | 10182.47 | 5359.53  | 8258     | 136   |
| H7BA | 8655.04  | 6640.63  | 8485.97  | 101   |
| H7BB | 9430.39  | 6618.24  | 7799.61  | 101   |
| H8BA | 10292.8  | 5367.06  | 8286.48  | 151   |
| H8BB | 9709.99  | 5612.67  | 9014.62  | 151   |
| H8BC | 10707.75 | 6197.83  | 8700.93  | 151   |
| H9A  | 7034.6   | 5313.23  | 9170.04  | 116   |
| H9B  | 5910.81  | 4980.22  | 9568.44  | 116   |

| <b>Atom</b> | <b><i>x</i></b> | <b><i>y</i></b> | <b><i>z</i></b> | <b>U(eq)</b> |
|-------------|-----------------|-----------------|-----------------|--------------|
| H10A        | 6872.86         | 3999.12         | 10017.24        | 190          |
| H10B        | 7897.61         | 4698.98         | 10015.43        | 190          |
| H10C        | 7825.01         | 3991.16         | 9415.01         | 190          |
| H9B1        | 7268.57         | 5562.18         | 9178.42         | 113          |
| H9B2        | 6418.4          | 4930.64         | 9554.17         | 113          |
| H10D        | 7821.6          | 4003.3          | 9601.82         | 164          |
| H10E        | 8358.99         | 4847.16         | 9941.76         | 164          |
| H10F        | 8667.52         | 4573.35         | 9152.21         | 164          |
| H11A        | 2371.11         | 4563.25         | 8446.8          | 113          |
| H11B        | 3561.01         | 4742.88         | 8998.05         | 113          |
| H12A        | 2568.53         | 3178.61         | 8691.66         | 199          |
| H12B        | 3759.22         | 3355.51         | 9229.55         | 199          |
| H12C        | 3889.14         | 3189.07         | 8392.3          | 199          |
| H11C        | 3086.61         | 3852.34         | 7808.04         | 107          |
| H11D        | 2969.99         | 4777.84         | 8110.34         | 107          |
| H12D        | 2564.54         | 3300.63         | 8881.52         | 148          |
| H12E        | 2210.13         | 4210.71         | 9117.52         | 148          |
| H12F        | 3554.39         | 3861.13         | 9335.6          | 148          |
| H13         | 4686.07         | 4392.21         | 5618.13         | 75           |
| H14         | 4636.1          | 3522.87         | 6792.62         | 76           |
| H15         | 6838.2          | 3562.92         | 7481.04         | 76           |
| H16         | 8215.51         | 4456.38         | 6732            | 76           |
| H17         | 6900.64         | 4983.6          | 5575.13         | 76           |
| H13B        | 4252.26         | 3953.33         | 6104.69         | 74           |
| H14B        | 5331.19         | 3412.23         | 7321.57         | 75           |
| H15B        | 7643.63         | 3858.48         | 7384.59         | 76           |
| H16B        | 7963.32         | 4690.18         | 6228.91         | 76           |
| H17B        | 5874.59         | 4759.49         | 5429.46         | 75           |

**Figure S1 (p 11).** The solution-state UV-Vis spectra of  $\text{Na}\{\text{CoCp}[\text{OP}(\text{OEt})_2]_3\}$  in MeCN.

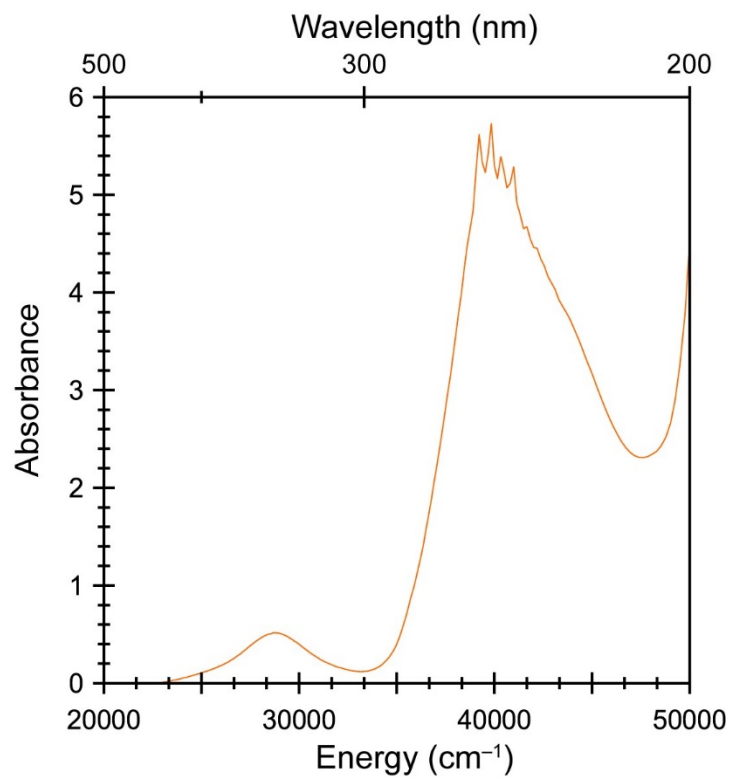

**Figure S2 (p 12).** The solution-state  $^1\text{H}$  NMR spectrum of  $\text{Na}\{\text{CoCp}[\text{OP}(\text{OEt})_2]_3\}$  in  $\text{CDCl}_3$ .

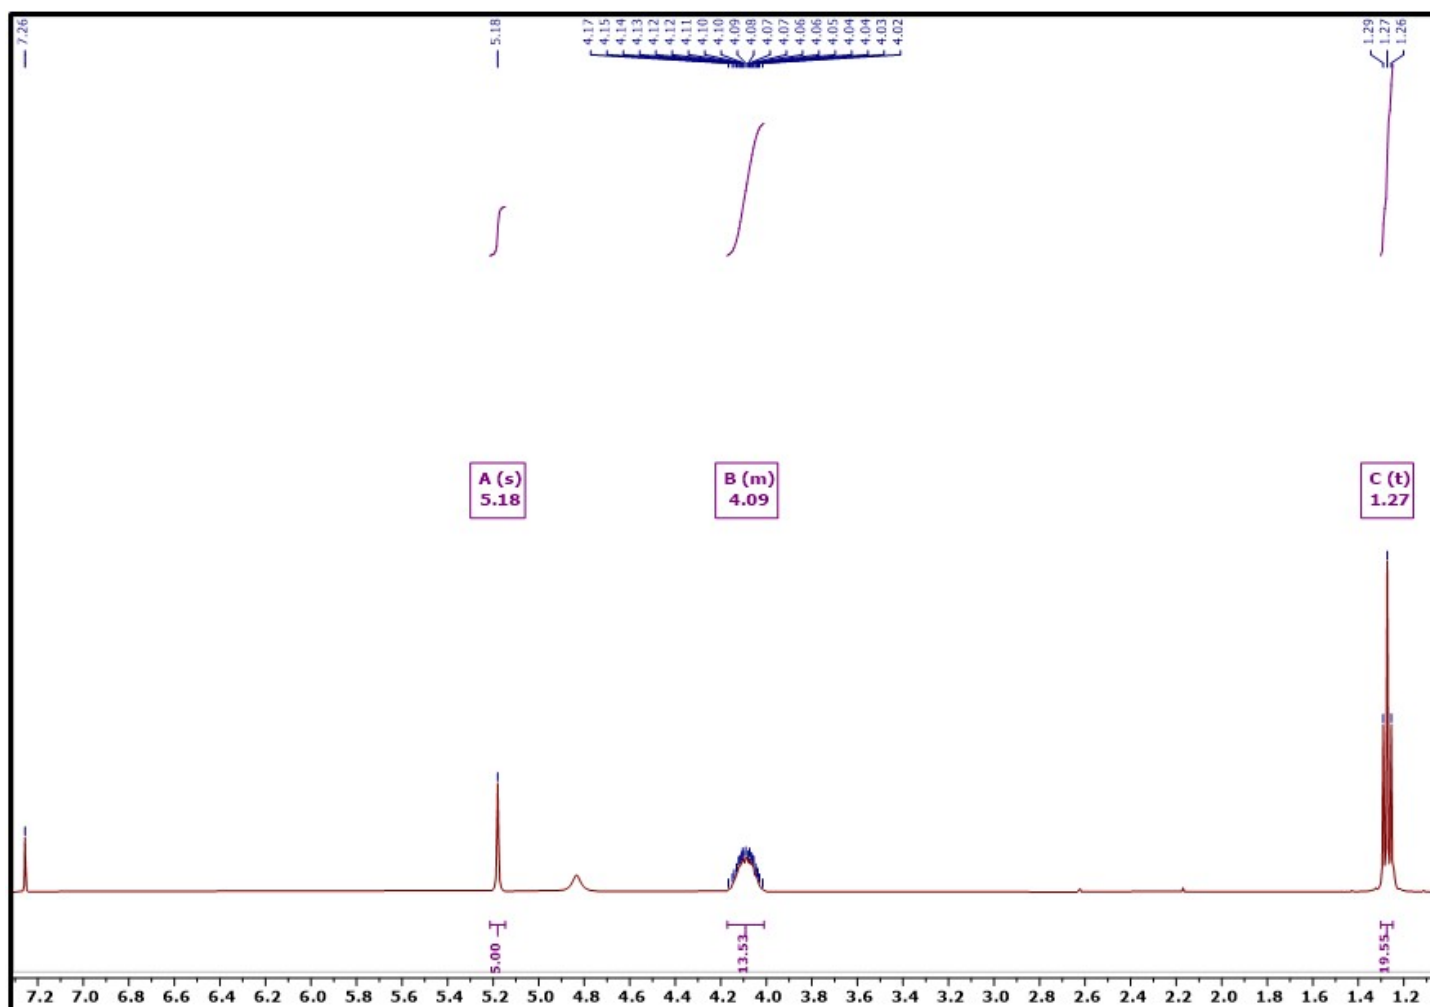

**Figure S3 (p 13).** The solution-state  $^1\text{H}$  NMR spectrum of  $\text{PuCl}_3\{\text{CoCp}[\text{OP}(\text{OEt})_2]_3\}$  in  $\text{CDCl}_3$ . The inset is a zoomed in view of the doublet of quintets at 3.03 ppm that correspond to the methylene protons of the  $\text{CoCp}[\text{OP}(\text{OEt})_2]_3^-$  ligand.

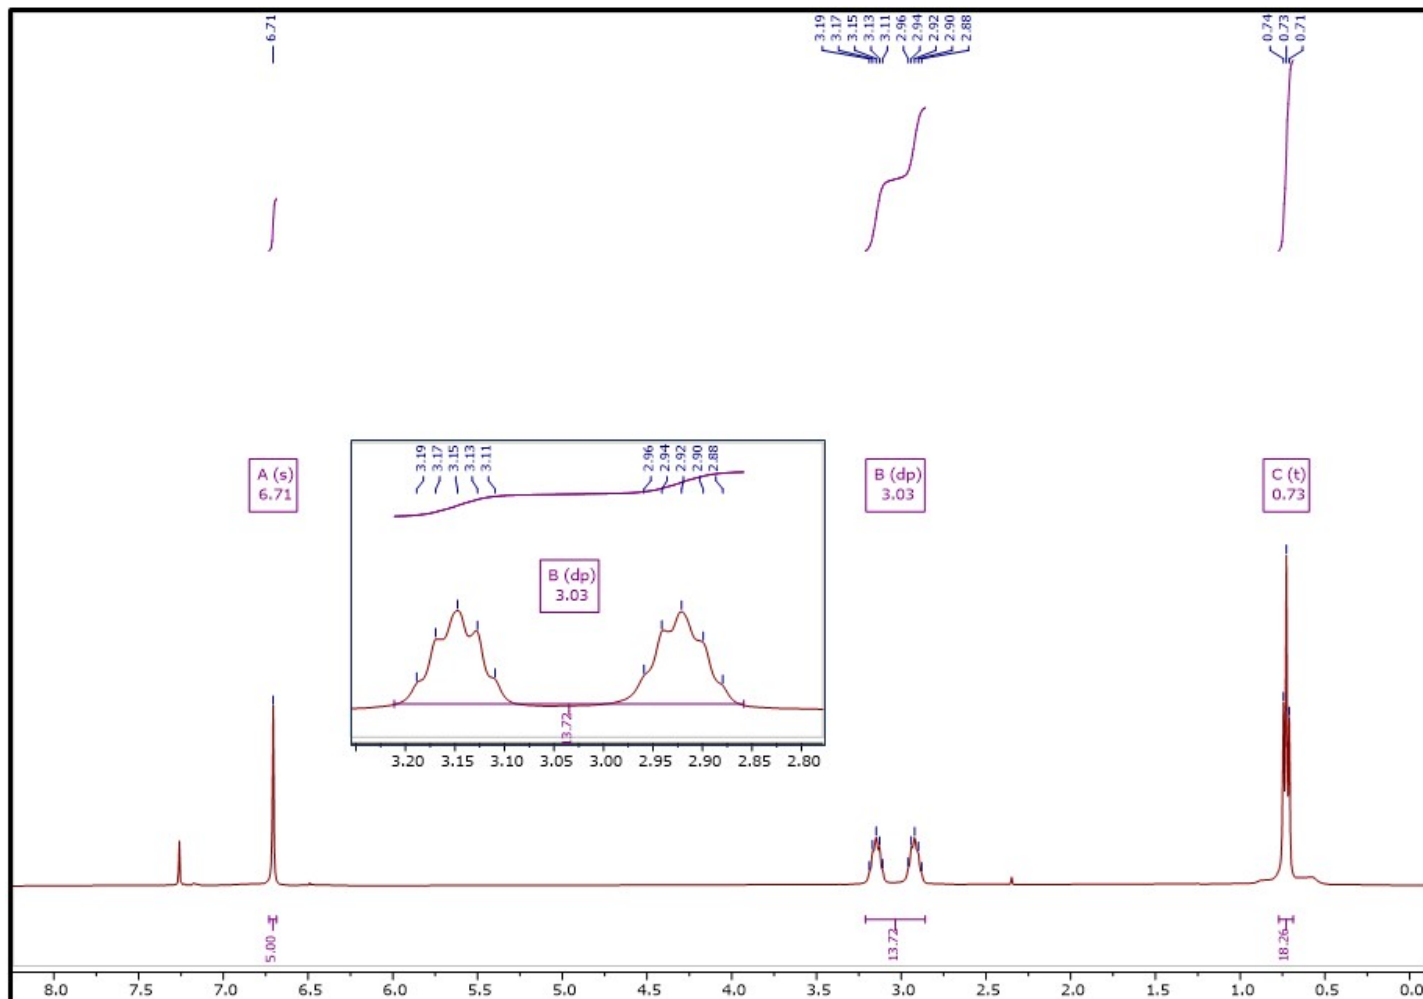

Supplement: d4sc01767f1.pdf [file d4sc01767f1.pdf]
